# Supplementary material for: mTert induction in p21-positive cells counteracts capillary rarefaction and pulmonary emphysema
Source: PubMed Central journal article supplement (PMC10933469; doi:10.1038/s44319-023-00041-1), 2024-02-29
Supplement: 44319_2023_41_MOESM15_ESM.pdf [file 44319_2023_41_MOESM15_ESM.pdf]

## Expanded View Figures

**Figure EV1. Validation of p21<sup>+/-Tert</sup> model.**

(A) p21<sup>+/+</sup> and p21<sup>+/-Tert</sup> littermates were subjected to whole-body ionizing radiation (1.5 gray). The fluorescence emitted by the mCherry was followed post-irradiation at the indicated times by in vivo mCherry imaging (Excitation = 545 nm, Background = 495 nm, Emission = 615 nm). (B) Left panel, p21 expression and mCherry fluorescence were analyzed in the liver and kidneys after doxorubicin treatments. Right panel, livers and kidneys of p21<sup>+/+</sup> and p21<sup>+/-Tert</sup> mice were harvested 24 h after doxorubicin treatment. The level of p21 protein was evaluated by semi-quantitative immunoblotting and liver and kidney were imaged for mCherry fluorescence. (C) Primers to distinguish transgene expression from total Tert expression are shown. (D) Tert RT-qPCR experiments were performed using RNA extracted from the harvested organs. The mean and the SEM of the three biological PCR replicates are plotted. For both organs, the difference between the doxorubicin-treated and untreated samples is statistically significant ( $p < 0.001$ , unpaired Student's *t* test) for the p21<sup>+/-Tert</sup> but not p21<sup>+/+</sup> mice.

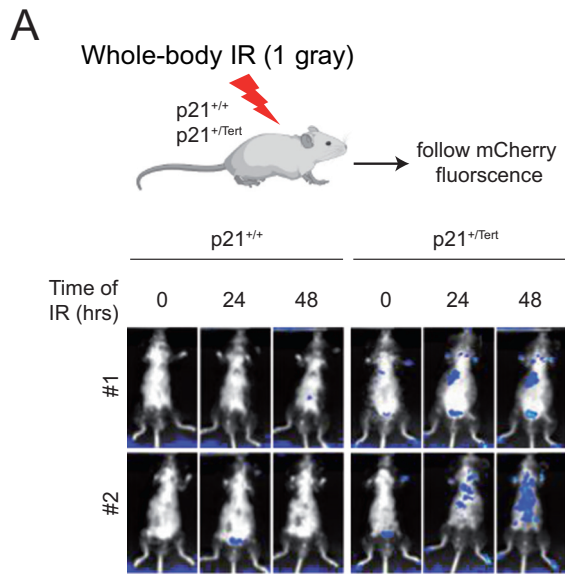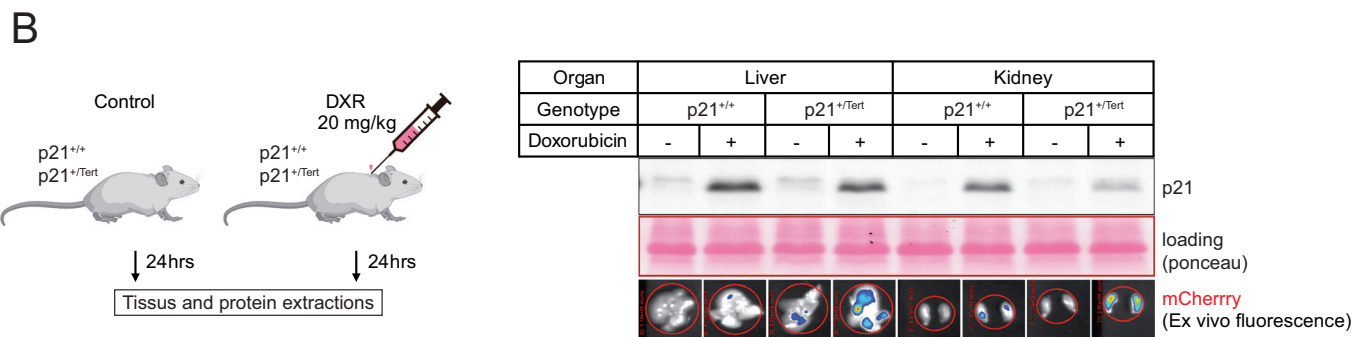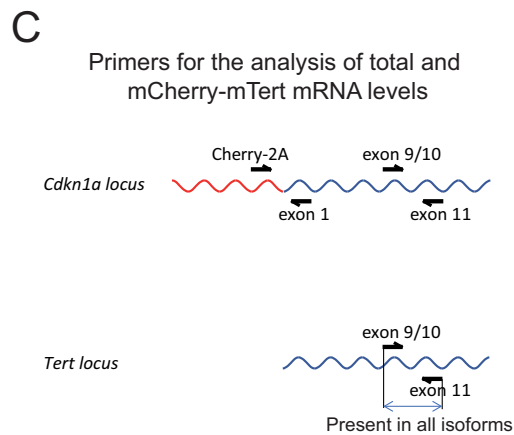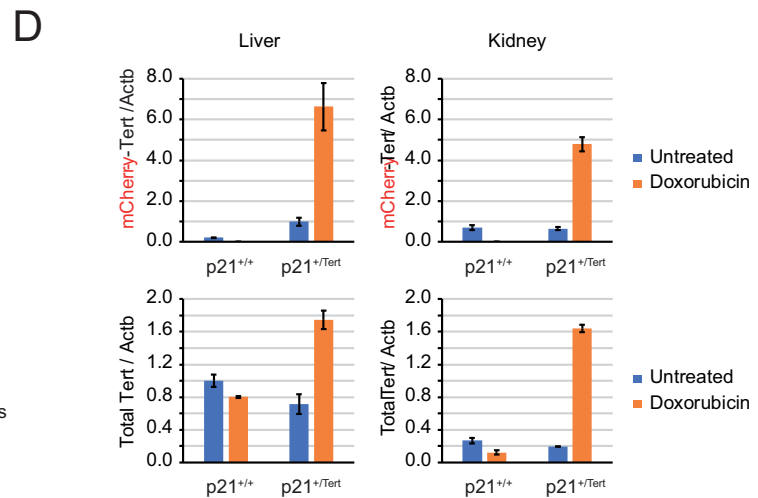

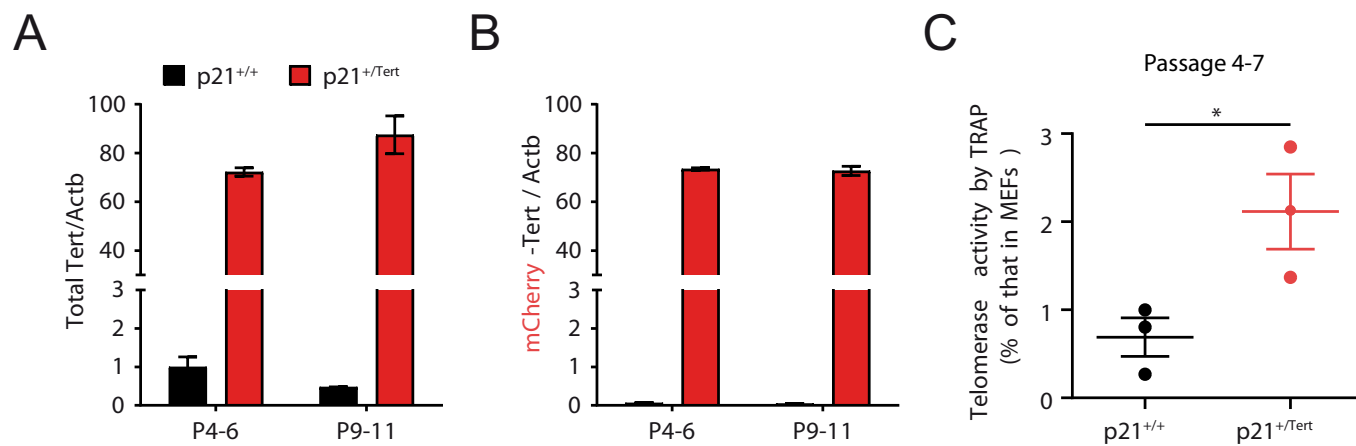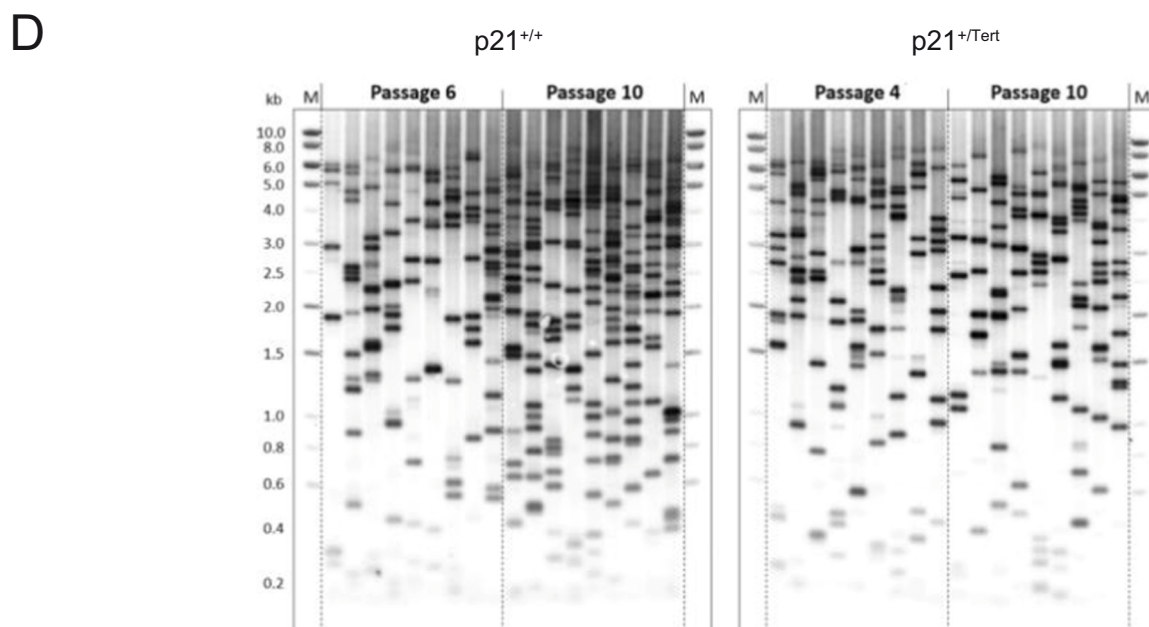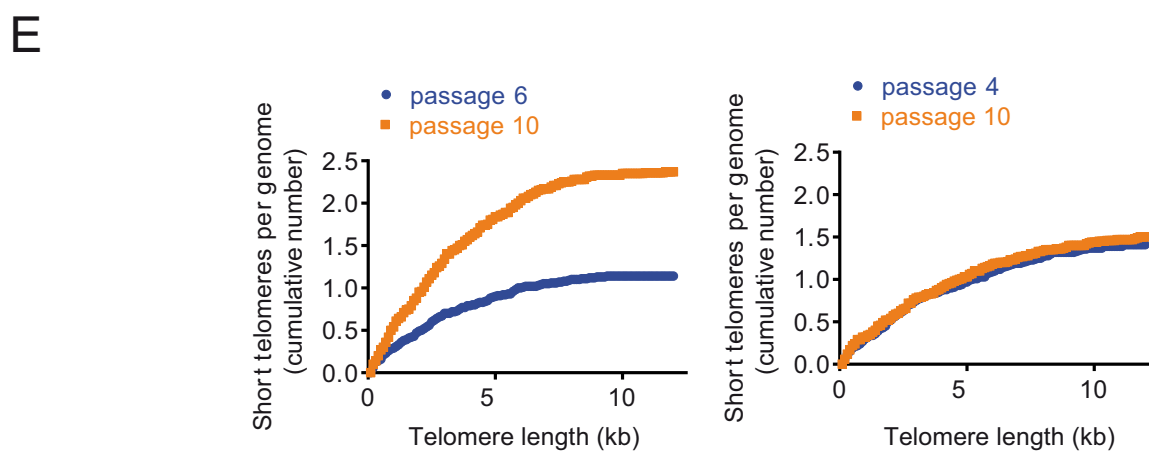

**◀ Figure EV2. p21-promoter dependent mTert expression bypasses senescence in PA-SMCs ex vivo (related to Fig. 1C).**

(A, B) Quantification of the mTert mRNA levels in PA-SMCs from the p21<sup>+/+</sup> and p21<sup>+Tert</sup> 4-month-old mice (littermates) at early (p4-6) and late (p9-11) passage. Left panel represents the level of total Tert mRNA (transcribed from both the native Tert locus and KI allele), while right panel represents the level of Tert mRNA transcribed from KI allele only. Nearly all Tert mRNA is transcribed from the KI allele. The means of three independent measurements are plotted, and the error bars are SEs. The difference in the level of Tert mRNA between the p21<sup>+/+</sup> and p21<sup>+Tert</sup> cells is highly significant ( $p < 0.001$ , unpaired Student's *t* test) for both early and late passages. (C) Telomerase activity measured by qTRAP at early passages. The data points correspond to vascular PA-SMC cultures established from individual p21<sup>+/+</sup> and p21<sup>+Tert</sup> 4-month-old mice. The data are expressed as the mean  $\pm$  SEM. \* $p < 0.05$  from the two-sided *t* test. (D, E) Analysis of the short telomere fraction by Telomere Shortest Length Assay (TeSLA) in the cultured PA-SMCs from p21<sup>+/+</sup> and p21<sup>+Tert</sup> mice. Southern blots probed for the TTAGGG repeats in (A) and quantification of the cumulative number of short telomeres across the telomere length thresholds in (E). Source data are available online for this figure.

A

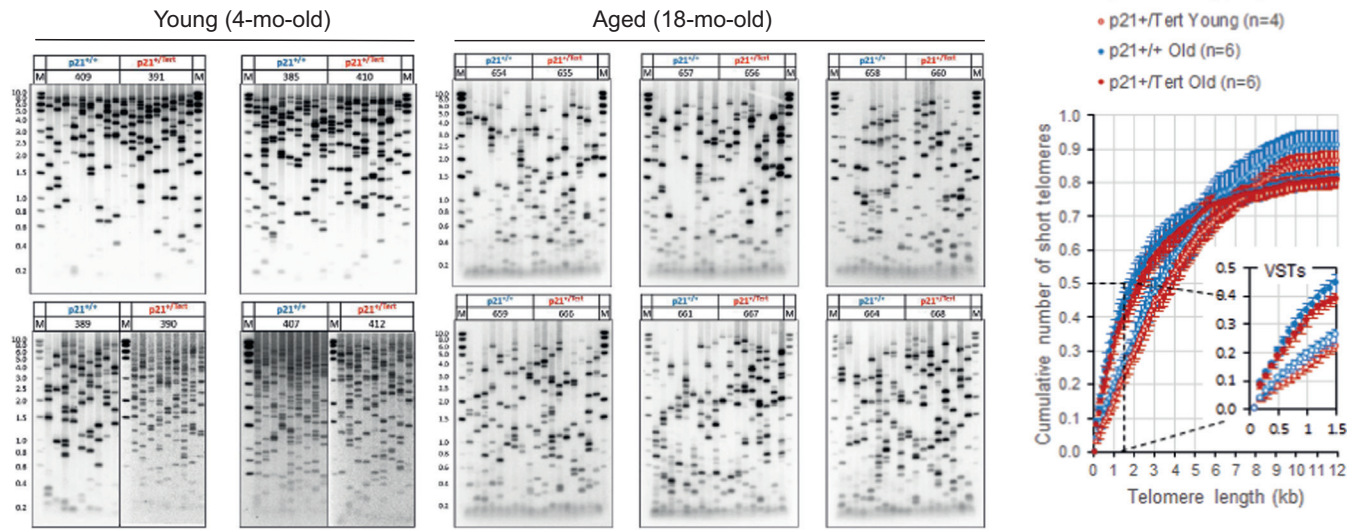

B

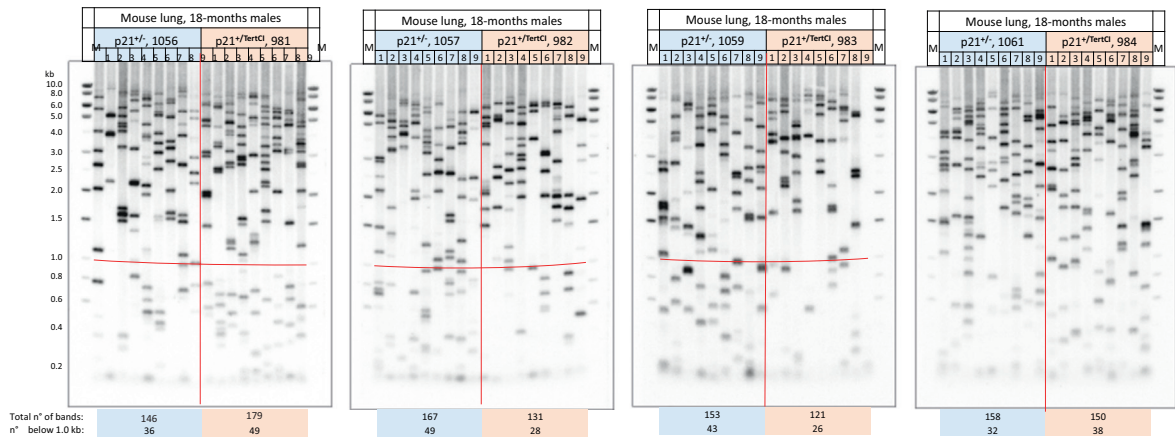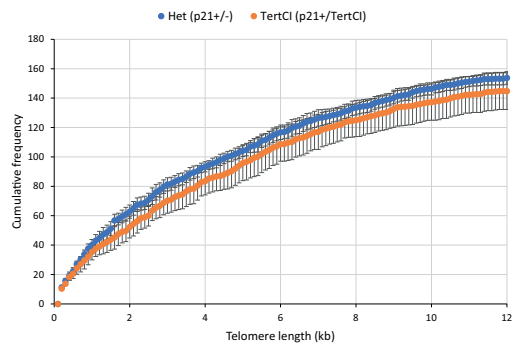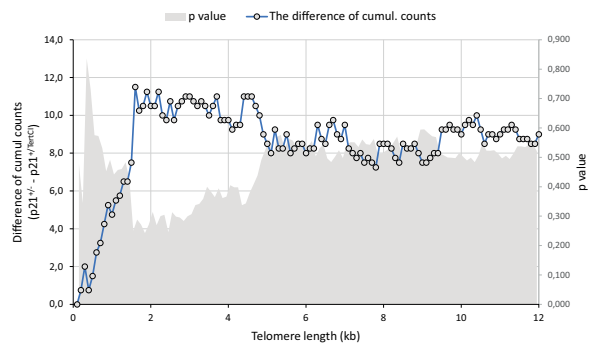

**◀ Figure EV3. Analysis of the individual short telomeres by TeSLA in the lungs of the young and old mice.**

(A) TeSLA Southern blots depicting short telomeres in the lungs of the  $p21^{+/+}$  and  $p21^{-/Tert}$  littermates (4 and 18-month-old mice). Genomic DNA was extracted from whole lungs and the length of individual short telomeres was determined by TeSLA. Note that young mice, regardless of their genotype, have less telomeres shorter than 1 kb compared to the old mice. The graph depicts cumulative number of short telomeres per genome in the range of 0.2-12 kb. The area corresponding to the very short telomeres (VSTs) is magnified in the inset. The mean values  $\pm$  SEM are plotted. (B) TeSLA Southern blots depicting short telomeres in the lungs of the  $p21^{+/-}$  and  $p21^{+/-Tert^{Cl}}$  mice (18-month-old). TeSLA Southern blots are shown on top. The graph on the bottom left shows the cumulative frequency of short telomeres in the range of 0.2-12 kb for the mice of two genotypes. The graph on the bottom right depicts the difference of cumulative counts for 0.1 kb bins between the two genotypes (left y axis) and the corresponding  $p$  values from the two-tailed  $t$  test (right y axis). The difference is not significant for any bin indicating that  $Tert^{Cl}$  is unable to improve the load of the short telomeres in old mice.

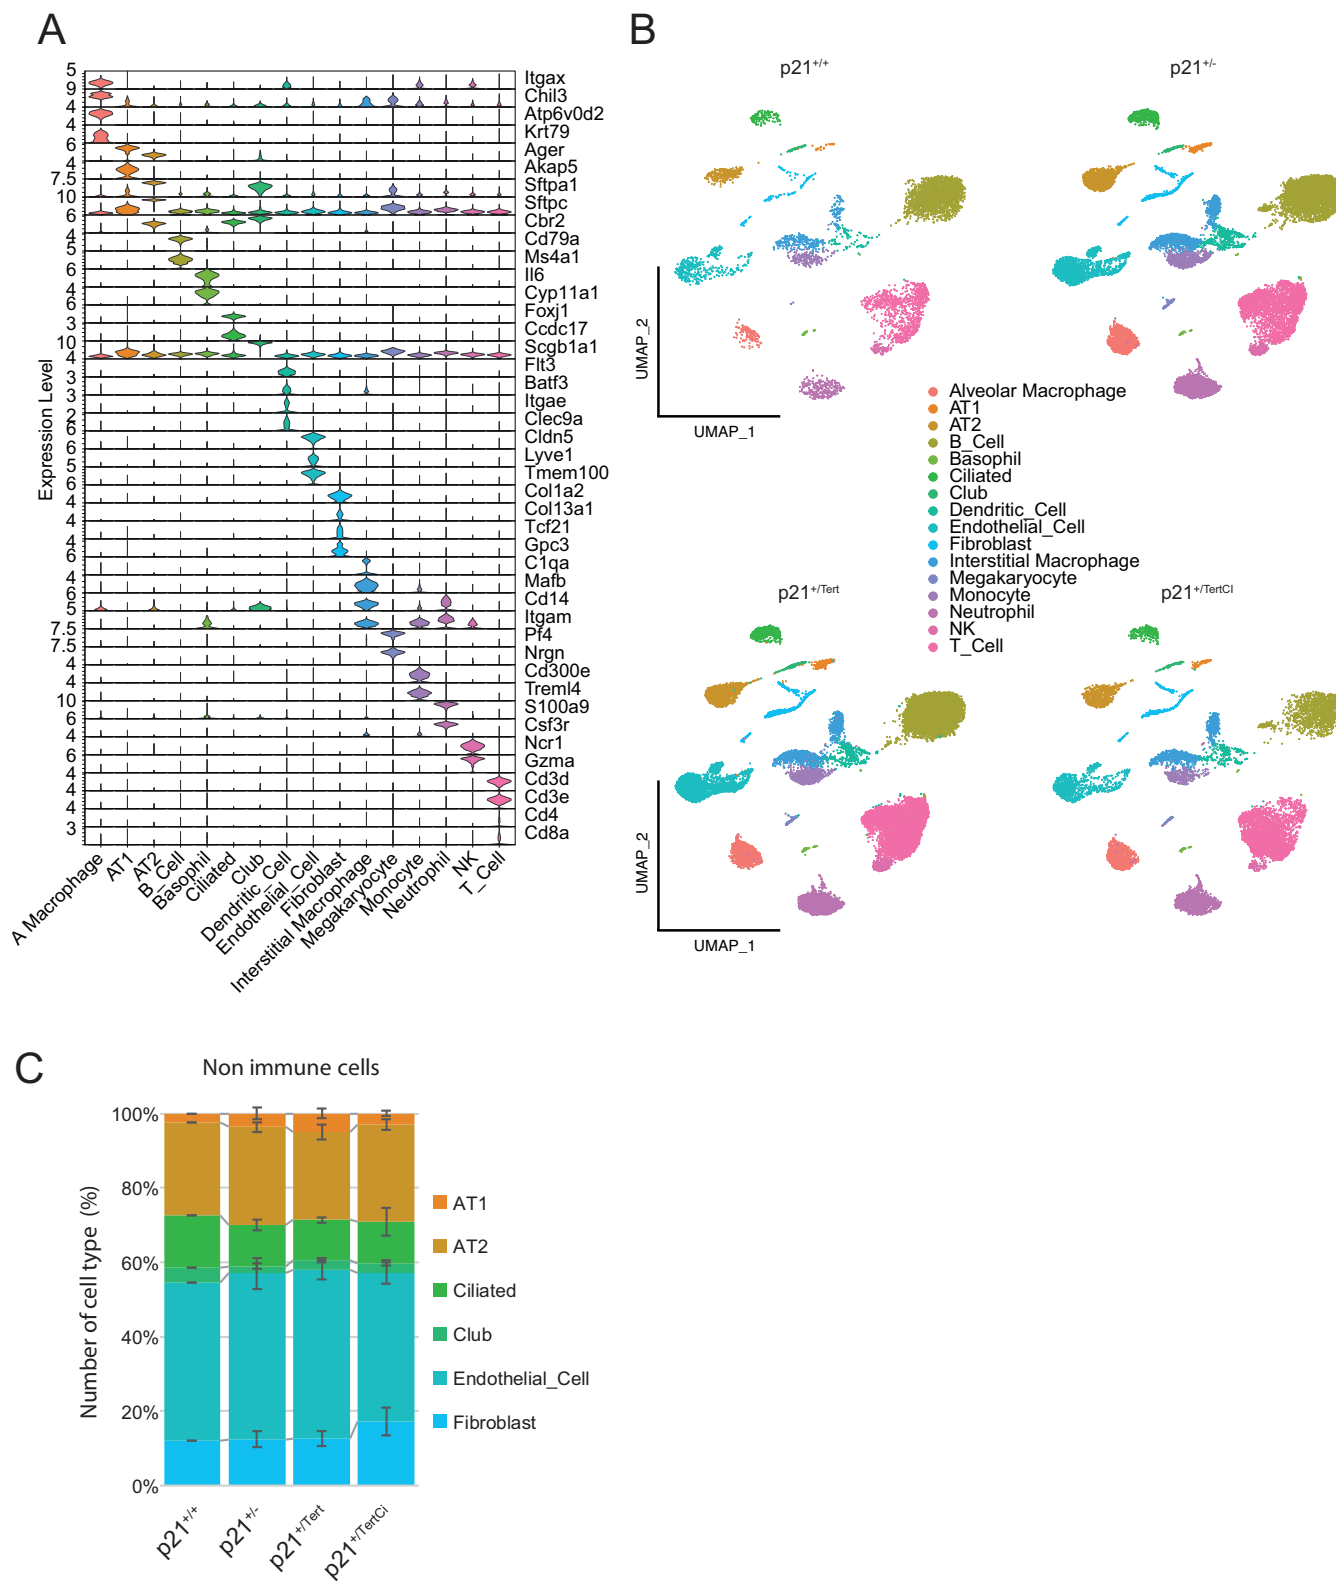

**Figure EV4. Lung cell types in the four mouse models.**

(A) Representative markers use to annotate lung cell types in the four mouse models. (B) UMAP clustering of lung cells. Lung cell populations were identified in lung samples from WT ( $p21^{+/+}$ ),  $p21^{+/-}$ ,  $p21^{+/Tert}$  and  $p21^{+/TertCl}$  18-month old mice. (C) Quantification of the cell types in lungs of the mice of the 4 indicated genotypes. At least 3 mice of each genotype were analyzed. The mean values  $\pm$  SEM are plotted.

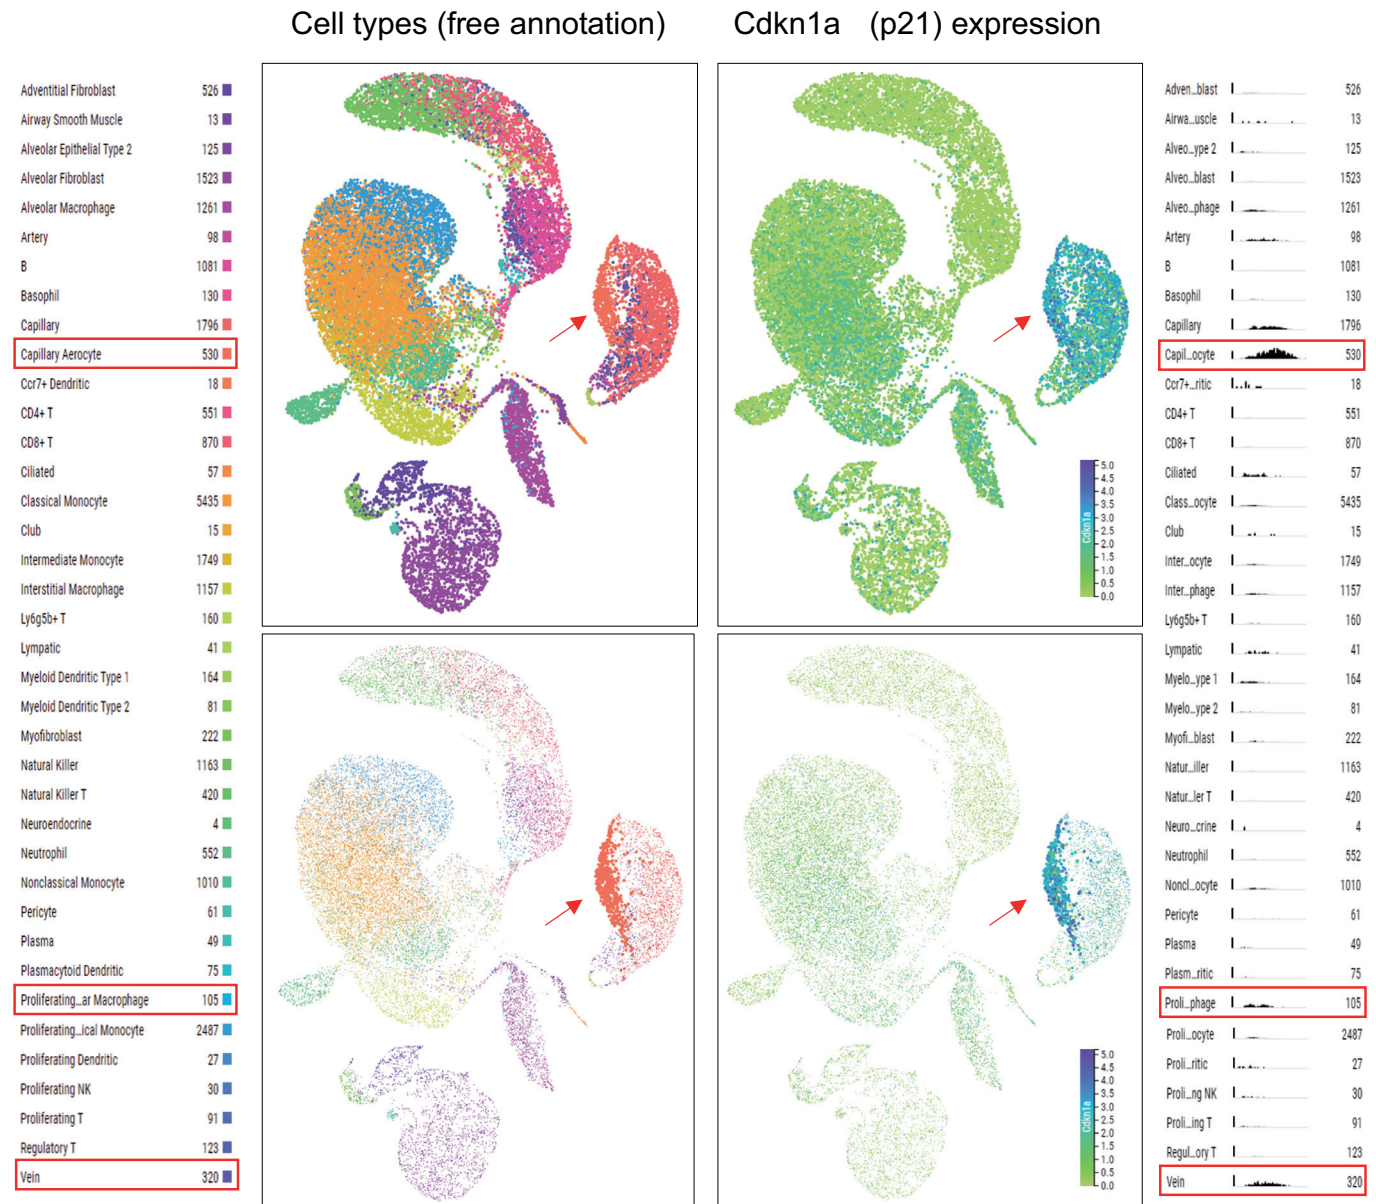

**Figure EV5. UMAP plots generated using lung droplet scRNA-seq data in Tabula Muris Senis.**

The data for mice of all ages (1–30 months) were included. In the top panels all cell types are shown, while in the bottom panels only the capillary aerocyte population is highlighted. Red arrow points to the capillary aerocytes, and red boxes in the annotation mark cell types with elevated p21 expression level. Histograms (on the right) show scaled number of cells expressing p21 (y axis) versus expression level (x axis).
